# Supplementary material for: Outcomes After Implementation of a Benzodiazepine-Sparing Alcohol Withdrawal Order Set in an Integrated Health Care System
Source: PubMed Central journal article supplement (PMC8864512; doi:10.1001/jamanetworkopen.2022.0158), 2022-02-22
Supplement: jamanetwopen-e220158-s001.pdf [file jamanetwopen-e220158-s001.pdf]

## Supplemental Online Content

Smith JT, Sage M, Szeto H, et al. Outcomes after implementation of a benzodiazepine-sparing alcohol withdrawal order set in an integrated health care system. *JAMA Netw Open*. 2022;5(2):e220158. doi:10.1001/jamanetworkopen.2022.0158

**eTable 1.** Elements of Preimplementation Non-Intensive Care Unit Order Set for Alcohol Withdrawal Syndrome

**eFigure 1.** Proportion of Potential Patients With Alcohol Withdrawal and Alcohol Withdrawal Order Set Use

**eTable 2.** Outcomes by First Clinical Institute Withdrawal Assessment for Alcohol, Revised Score Value Category

**eTable 3.** Difference-in-Differences Adjusted Outcomes in Sensitivity Analyses

**eTable 4.** Baseline Characteristics of Hospitalizations for Alcohol Withdrawal Syndrome With Use of Alcohol Withdrawal-Relevant Medication

**eTable 5.** Baseline Characteristics of Hospitalizations for Alcohol Withdrawal Syndrome With Use  $\geq 1$  Benzodiazepine

**eTable 6.** Baseline Characteristics of Hospitalizations for Alcohol Withdrawal Syndrome 12 mo Before and After Implementation

**eMethods.** SAS Code for Difference-in-Differences Analysis

This supplemental material has been provided by the authors to give readers additional information about their work.

**eTable 1a.** Elements of Preimplementation Non–Intensive Care Unit Order Set for Alcohol Withdrawal Syndrome

| Pathway                                                                                                               | Treatment                              | Dosing                                                                                                                                                                        |
|-----------------------------------------------------------------------------------------------------------------------|----------------------------------------|-------------------------------------------------------------------------------------------------------------------------------------------------------------------------------|
| <b>Observation (Criteria: CIWA-Ar &lt;8)</b><br>Measure CIWA-Ar every 6 hours with no medication orders               |                                        |                                                                                                                                                                               |
| <b>Withdrawal Prophylaxis (Criteria: CIWA-Ar &lt;8)</b><br>Measure CIWA-Ar every 6 hours with diazepam or lorazepam   |                                        |                                                                                                                                                                               |
|                                                                                                                       | Diazepam (mild risk)                   | Day 1: 10 mg by mouth every 8 hours<br>Day 2: 10 mg by mouth every 12 hours<br>Day 3: 10 mg by mouth every daily                                                              |
|                                                                                                                       | Lorazepam (mild risk) <sup>a</sup>     | Day 1: 1 mg by mouth every 8 hours<br>Day 2: 1 mg by mouth every 12 hours<br>Day 3: 1 mg by mouth every daily                                                                 |
|                                                                                                                       | Diazepam (moderate risk)               | Day 1: 10 mg by mouth every 6 hours<br>Day 2: 10 mg by mouth every 8 hours<br>Day 3: 10 mg by mouth every 12 hours                                                            |
|                                                                                                                       | Lorazepam (moderate risk) <sup>a</sup> | Day 1: 1 mg by mouth every 6 hours<br>Day 2: 1 mg by mouth every 8 hours<br>Day 3: 1 mg by mouth every 12 hours                                                               |
|                                                                                                                       | Diazepam (severe risk)                 | Day 1 to 2: 10 mg by mouth every 6 hours<br>Day 3: 10 mg by mouth every 8 hours<br>Day 4: 10 mg by mouth every 12 hours                                                       |
|                                                                                                                       | Lorazepam (severe risk) <sup>a</sup>   | Day 1: 2 mg by mouth every 6 hours<br>Day 2: 2 mg by mouth every 8 hours<br>Day 3: 2 mg by mouth every 12 hours                                                               |
| <b>Active Withdrawal Treatment (Criteria: CIWA-Ar ≥8)</b><br>Measure CIWA-Ar every 4 hours with diazepam or lorazepam |                                        |                                                                                                                                                                               |
|                                                                                                                       | Diazepam                               | CIWA-Ar score 8-13: 10 mg by mouth every hour as needed<br>CIWA-Ar score 14-20: 15 mg by mouth every hour as needed<br>CIWA-Ar score ≥21: 20 mg by mouth every hour as needed |
|                                                                                                                       | Lorazepam <sup>a</sup>                 | CIWA-Ar score 8-13: 1 mg by mouth every hour as needed<br>CIWA-Ar score 14-20: 2 mg by mouth every hour as needed<br>CIWA-Ar score ≥21: 4 mg by mouth every hour as needed    |
| <b>IV Fluids and Other Medications</b><br>Thiamine, folic acid, multivitamin, and maintenance fluid                   |                                        |                                                                                                                                                                               |
|                                                                                                                       | Thiamine                               | Day 1 to 5: 100 mg by mouth 2 times daily                                                                                                                                     |
|                                                                                                                       | Folic Acid                             | Day 1+: 1 mg by mouth daily                                                                                                                                                   |
|                                                                                                                       | Multivitamin                           | Day 1+: 1 tablet by mouth daily                                                                                                                                               |
|                                                                                                                       | Maintenance fluid                      | Day 1+: 20 mEq/L potassium chloride in 5% dextrose and 0.45% sodium chloride at 100 mL/hr by IV route continuously                                                            |

<sup>a</sup>May be administered by IV route if patient is unable to tolerate oral dosing.

Abbreviations: CIWA-Ar, Clinical Institute Withdrawal Assessment for Alcohol, revised.<sup>8</sup>

**eTable 1b.** Elements of Preimplementation Non–Intensive Care Unit Order Set for Alcohol Withdrawal Syndrome

| <p><b>ICU Acute Alcohol Withdrawal</b><br/>Discontinue any other sedatives, hypnotics, central nervous system depressants, or tranquilizers</p> <p>Measure CIWA-Ar every 15 minutes after every lorazepam dose, every 2 hours while awake, and 4 hours while asleep</p>                                                                                                                                                                                                                                                                                                          |              |              |
|----------------------------------------------------------------------------------------------------------------------------------------------------------------------------------------------------------------------------------------------------------------------------------------------------------------------------------------------------------------------------------------------------------------------------------------------------------------------------------------------------------------------------------------------------------------------------------|--------------|--------------|
| <p><b>Loading</b></p> <ol style="list-style-type: none"> <li>1. Start lorazepam using <i>Dose Scale A</i> based on CIWA-Ar</li> <li>2. Reassess CIWA-Ar score 15 minutes after administering the 1<sup>st</sup> dose and if needed give 2<sup>nd</sup> dose per <i>Dose Scale A</i></li> <li>3. Reassess CIWA-Ar score 30 minutes after administering the 1<sup>st</sup> dose</li> <li>4. If CIWA-Ar score is ≤15, continue to use <i>Dose Scale A</i></li> <li>5. If CIWA-Ar score if &gt;15, move to <i>Dose Scale B</i> and administer lorazepam dose per protocol</li> </ol> |              |              |
| <p><b>Monitoring</b><br/>Measure CIWA-Ar every 15 minutes after every lorazepam dose, every 2 hours while awake, and 4 hours while asleep</p>                                                                                                                                                                                                                                                                                                                                                                                                                                    |              |              |
| <p><b>Escalation</b></p> <ol style="list-style-type: none"> <li>1. If using <i>Dose Scale A</i> and 2 doses of lorazepam within 30 minutes fail to improve a CIWA-AR score of greater than 15, move to <i>Dose Scale B</i> and give Lorazepam dose per protocol</li> <li>2. If using <i>Dose Scale B</i> and 2 doses of lorazepam within 30 minutes fail to improve a CIWA-Ar score of greater than 20, notify physician</li> </ol>                                                                                                                                              |              |              |
| CIWA-Ar Score                                                                                                                                                                                                                                                                                                                                                                                                                                                                                                                                                                    | Dose Scale A | Dose Scale B |
| >20                                                                                                                                                                                                                                                                                                                                                                                                                                                                                                                                                                              | 4 mg IV      | 6 mg IV      |
| 16-20                                                                                                                                                                                                                                                                                                                                                                                                                                                                                                                                                                            | 3 mg IV      | 5 mg IV      |
| 11-15                                                                                                                                                                                                                                                                                                                                                                                                                                                                                                                                                                            | 2 mg IV      | 4 mg IV      |
| 6-10                                                                                                                                                                                                                                                                                                                                                                                                                                                                                                                                                                             | 1 mg IV      | 3 mg IV      |
| 0-5                                                                                                                                                                                                                                                                                                                                                                                                                                                                                                                                                                              | 0 mg IV      | 0 mg IV      |

<sup>a</sup>May be administered by IV route if patient is unable to tolerate oral dosing.

Abbreviations: CIWA-Ar, Clinical Institute Withdrawal Assessment for Alcohol, revised;<sup>8</sup> ICU, intensive care unit.

**eFigure 1.** Proportion of Potential Patients With Alcohol Withdrawal and Alcohol Withdrawal Order Set Use

The blue circles represent quarterly proportions while the red line displays a smooth fitted line. The dotted black line represents the implementation of the novel benzodiazepine-sparing orderset.

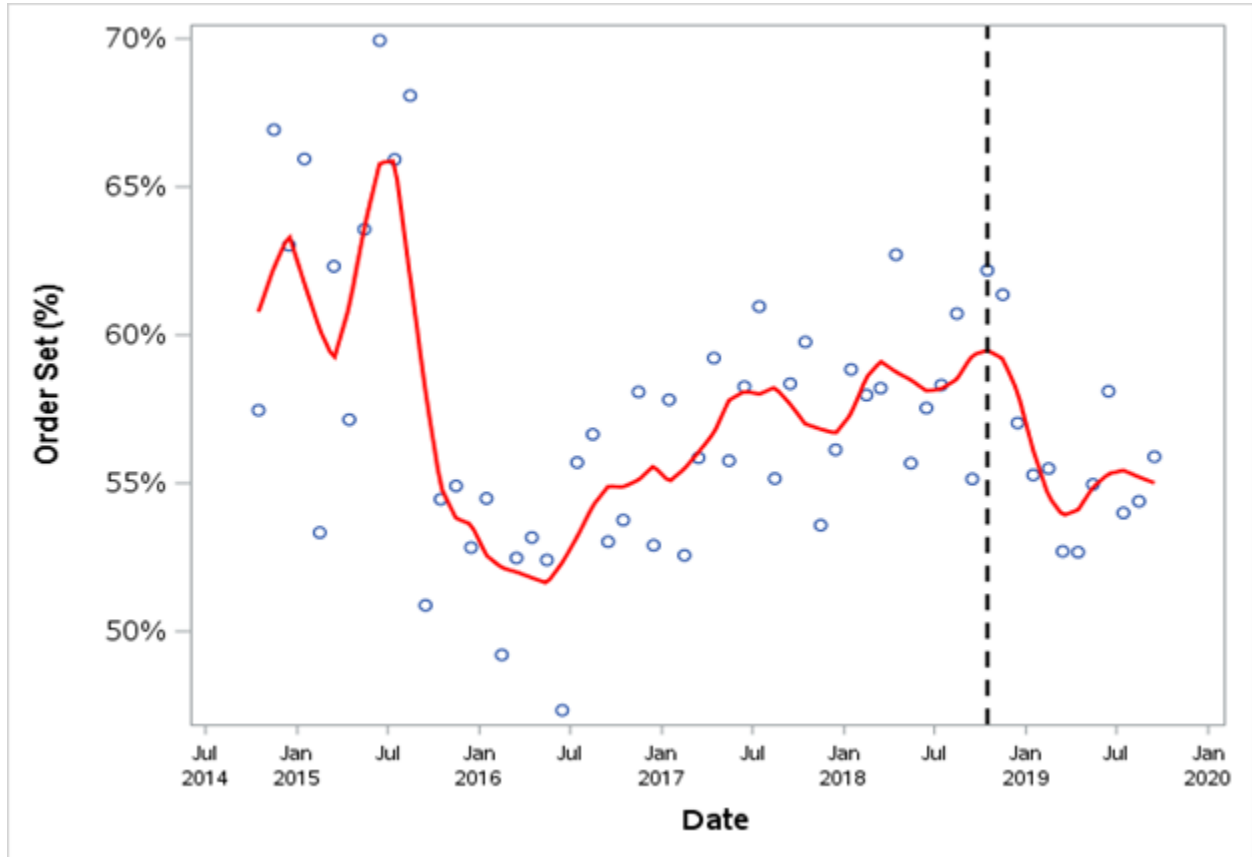

**eTable 2.** Outcomes by First Clinical Institute Withdrawal Assessment for Alcohol, Revised Score Value Category

|                      | First CIWA-Ar value |               |            | P value |
|----------------------|---------------------|---------------|------------|---------|
|                      | Low (<8)            | Medium (8-14) | High (≥15) |         |
| Inpatient mortality  | 145 (1.7)           | 24 (0.9)      | 16 (0.8)   | .001    |
| Length of stay, days | 4.7 ± 7.6           | 4.5 ± 6.1     | 4.6 ± 6.7  | .32     |
| ICU admission        | 2,213 (25.3)        | 692 (26.9)    | 711 (34.0) | <.001   |
| Readmission          | 1,463 (17.0)        | 432 (16.9)    | 354 (17.1) | .99     |

Abbreviations: CIWA-Ar, Clinical Institute Withdrawal Assessment for Alcohol, revised;<sup>8</sup> ICU, intensive care unit.

**eTable 3.** Difference-in-Differences Adjusted Outcomes in Sensitivity Analyses<sup>a</sup>

**Including hospitalizations: (1) with at least on alcohol withdrawal-relevant medication administration<sup>b</sup>; (2) with at least one benzodiazepine administered<sup>c</sup>; and (2) within the 12-month periods before and after implementation.**

| Outcome                           | Difference-in-differences change           |                                   |                                         |
|-----------------------------------|--------------------------------------------|-----------------------------------|-----------------------------------------|
|                                   | At least one AWS-relevant medication given | At least one benzodiazepine given | 12 month pre- and post- periods         |
| Inpatient mortality               | 0.70 (0.28-1.75);<br>P=.45                 | 0.70 (0.26-1.88);<br>P=.48        | 0.68 (0.52-0.89);<br>P=.005             |
| Length of stay, days <sup>d</sup> | 0.65 (0.50-0.85);<br>P=.001                | 0.56 (0.41-0.76);<br>P<.001       | 0.96 (0.93-0.99);<br>P=.02              |
| ICU admission                     | 0.65 (0.50 – 0.84);<br>P=.001              | 0.56 (0.42-0.75);<br>P<.001       | 1.00 (0.91 – 1.10);<br>P=.97            |
| Readmission                       | 0.70 (0.48-1.04);<br>P=.07                 | 0.61 (0.38-0.98);<br>P=.04        | 0.88 (0.79-0.98);<br>P=.02 <sup>e</sup> |

<sup>a</sup>Adjusted models include age, gender, COPS2, LAPS2, prior alcohol withdrawal hospitalization, maximum CIWA-Ar value, CIWA-Ar value recordings, observation status, month of year, weekend admission, urine toxicology assessed, and facility.

<sup>b</sup>Includes any benzodiazepine, clonidine, dexmedetomidine, gabapentin, phenobarbital, and/or valproic acid.

<sup>c</sup>Includes alprazolam, chlordiazepoxide, diazepam, lorazepam, midazolam, oxazepam, and/or temazepam.

<sup>d</sup>Assumed a gamma distribution and log-link in the GEE model.

<sup>e</sup>Parallel slopes in pre-period assumption not met.

Abbreviations: AWS, alcohol withdrawal; CIWA-Ar, Clinical Institute Withdrawal Assessment for Alcohol, revised;<sup>8</sup> CI, confidence interval; COPS2, Comorbidity Point Score, version 2;<sup>29</sup> ICU, intensive care unit; LAPS2, Laboratory Acute Physiology Score, version 2;<sup>29</sup>.

**eTable 4.** Baseline Characteristics of Hospitalizations for Alcohol Withdrawal Syndrome With Use of Alcohol Withdrawal-Relevant Medication<sup>a</sup>

| Characteristic                                                  | With use of an orderset           |                                    | Without use of an orderset        |                                    |
|-----------------------------------------------------------------|-----------------------------------|------------------------------------|-----------------------------------|------------------------------------|
|                                                                 | Pre-implementation<br>(n = 6,835) | Post-implementation<br>(n = 3,696) | Pre-implementation<br>(n = 2,987) | Post-implementation<br>(n = 1,680) |
| Age, mean (SD), years                                           | 53.1 (13.5)                       | 53.6 (14.2)                        | 58.8 (13.9)                       | 60.0 (14.6)                        |
| Male, (%)                                                       | 4,753 (69.5)                      | 2,556 (69.2)                       | 1,942 (65.0)                      | 1,075 (64.0)                       |
| Observation admission, (%)                                      | 714 (10.4)                        | 298 (8.1)                          | 186 (6.2)                         | 41 (2.4)                           |
| Weekend admission, (%)                                          | 1,791 (26.2)                      | 970 (26.2)                         | 497 (16.6)                        | 320 (19.0)                         |
| LAPS2, mean (SD)                                                | 68.2 (37.5)                       | 74.6 (39.7)                        | 50.6 (43.7)                       | 70.2 (48.2)                        |
| COPS2, mean (SD)                                                | 40.2 (43.3)                       | 41.4 (47.5)                        | 58.7 (55.4)                       | 65.9 (64.6)                        |
| Urine toxicology checked (%)                                    | 2,934 (42.9)                      | 1,802 (48.8)                       | 496 (16.6)                        | 409 (24.3)                         |
| Had ≥1 prior hospitalization for AWS within prior 6 months, (%) | 2,345 (34.3)                      | 1,333 (36.1)                       | 632 (21.2)                        | 377 (22.4)                         |
| Had ≥1 CIWA-Ar value recorded, (%)                              | 6,798 (99.5)                      | 3,610 (97.7)                       | 439 (14.7)                        | 100 (6.0)                          |
| <b>Elixhauser comorbidities<sup>b</sup></b>                     |                                   |                                    |                                   |                                    |
| Alcohol abuse, (%)                                              | 5,495 (80.4)                      | 3,204 (86.7)                       | 2,864 (95.9)                      | 1,655 (98.5)                       |
| Hypertension <sup>c</sup> , (%)                                 | 3,984 (58.3)                      | 2,212 (59.8)                       | 1,945 (65.1)                      | 1,157 (68.9)                       |
| Fluid and electrolyte disorders, (%)                            | 4,212 (61.6)                      | 2,406 (65.1)                       | 1,355 (45.4)                      | 1,001 (59.6)                       |
| Peripheral vascular disease, (%)                                | 2,347 (34.3)                      | 1,526 (41.3)                       | 1,560 (52.2)                      | 1,070 (63.7)                       |
| Liver disease, (%)                                              | 3,050 (44.6)                      | 1,855 (50.2)                       | 1,074 (36.0)                      | 690 (41.1)                         |
| <b>Hospital outcomes</b>                                        |                                   |                                    |                                   |                                    |
| Inpatient mortality, (%)                                        | 96 (1.4)                          | 82 (2.2)                           | 94 (3.1)                          | 124 (7.4)                          |
| Length of stay, mean (SD), d                                    | 5.0 (8.6)                         | 4.7 (5.6)                          | 6.1 (10.9)                        | 6.8 (9.3)                          |
| ICU admission, (%)                                              | 2,042 (29.9)                      | 1,057 (28.6)                       | 765 (25.6)                        | 523 (31.1)                         |
| Readmission within 30 days, (%)                                 | 1,211 (18.0)                      | 580 (16.0)                         | 577 (19.9)                        | 345 (22.2)                         |

<sup>a</sup>Includes any benzodiazepine, clonidine, dexmedetomidine, gabapentin, phenobarbital, and/or valproic acid.

<sup>b</sup>Includes only the 5 most common comorbidities.

<sup>c</sup>Includes complicated and uncomplicated hypertension.

Abbreviations: AWS, alcohol withdrawal; CIWA-Ar, Clinical Institute Withdrawal Assessment for Alcohol, revised;<sup>8</sup> COPS2, Comorbidity Point Score, version 2;<sup>29</sup> ICU, intensive care unit; IQR, interquartile range; LAPS2, Laboratory Acute Physiology Score, version 2;<sup>29</sup> SD, standard deviation.

**eTable 5.** Baseline Characteristics of Hospitalizations for Alcohol Withdrawal Syndrome With Use  $\geq 1$  Benzodiazepine<sup>a</sup>

| Characteristic                                                        | With use of an orderset           |                                    | Without use of an orderset        |                                  |
|-----------------------------------------------------------------------|-----------------------------------|------------------------------------|-----------------------------------|----------------------------------|
|                                                                       | Pre-implementation<br>(n = 6,431) | Post-implementation<br>(n = 2,823) | Pre-implementation<br>(n = 2,114) | Post-implementation<br>(n = 920) |
| Age, mean (SD), years                                                 | 52.6 (13.3)                       | 52.7 (13.8)                        | 57.9 (14.0)                       | 58.8 (14.8)                      |
| Male, (%)                                                             | 4,488 (69.8)                      | 1,943 (68.8)                       | 1,372 (64.9)                      | 575 (62.5)                       |
| Observation admission, (%)                                            | 668 (10.4)                        | 231 (8.2)                          | 144 (6.8)                         | 25 (2.7)                         |
| Weekend admission, (%)                                                | 1,686 (26.2)                      | 750 (26.6)                         | 354 (16.7)                        | 192 (20.9)                       |
| LAPS2, mean (SD)                                                      | 68.8 (37.2)                       | 76.3 (39.9)                        | 51.4 (44.5)                       | 76.9 (49.1)                      |
| COPS2, mean (SD)                                                      | 39.7 (43.1)                       | 40.3 (46.3)                        | 53.1 (51.9)                       | 59.7 (60.5)                      |
| Urine toxicology checked (%)                                          | 2,842 (44.2)                      | 1,443 (51.1)                       | 393 (18.6)                        | 260 (28.3)                       |
| Had $\geq 1$ prior hospitalization for AWS within prior 6 months, (%) | 2,238 (34.8)                      | 1,058 (37.5)                       | 437 (20.7)                        | 185 (20.1)                       |
| Had $\geq 1$ CIWA-Ar value recorded, (%)                              | 6,401 (99.5)                      | 2,776 (98.3)                       | 396 (18.7)                        | 66 (7.2)                         |
| <b>Elixhauser comorbidities<sup>b</sup></b>                           |                                   |                                    |                                   |                                  |
| Alcohol abuse, (%)                                                    | 5,111 (79.5)                      | 2,393 (84.8)                       | 2,016 (95.4)                      | 905 (98.4)                       |
| Hypertension <sup>c</sup> , (%)                                       | 3,684 (57.3)                      | 1,656 (58.7)                       | 1,323 (62.6)                      | 607 (66.0)                       |
| Fluid and electrolyte disorders, (%)                                  | 3,979 (61.9)                      | 1,862 (66.0)                       | 956 (45.2)                        | 561 (61.0)                       |
| Peripheral vascular disease, (%)                                      | 2,126 (33.1)                      | 1,096 (38.8)                       | 1,046 (49.5)                      | 571 (62.1)                       |
| Liver disease, (%)                                                    | 2,883 (44.8)                      | 1,452 (51.4)                       | 767 (36.3)                        | 373 (40.5)                       |
| <b>Hospital outcomes</b>                                              |                                   |                                    |                                   |                                  |
| Inpatient mortality, (%)                                              | 92 (1.4)                          | 74 (2.6)                           | 77 (3.6)                          | 97 (10.5)                        |
| Length of stay, mean (SD), d                                          | 5.1 (8.7)                         | 4.9 (5.9)                          | 6.4 (11.8)                        | 8.1 (11.1)                       |
| ICU admission, (%)                                                    | 1,939 (30.2)                      | 872 (30.9)                         | 572 (27.1)                        | 338 (36.7)                       |
| Readmission within 30 days, (%)                                       | 1,134 (17.9)                      | 445 (16.2)                         | 383 (18.8)                        | 178 (21.6)                       |

<sup>a</sup>Includes alprazolam, chlordiazepoxide, diazepam, lorazepam, midazolam, oxazepam, and/or temazepam.

<sup>b</sup>Includes only the 5 most common comorbidities.

<sup>c</sup>Includes complicated and uncomplicated hypertension.

Abbreviations: AWS, alcohol withdrawal; CIWA-Ar, Clinical Institute Withdrawal Assessment for Alcohol, revised;<sup>8</sup> COPS2, Comorbidity Point Score, version 2;<sup>29</sup> ICU, intensive care unit; IQR, interquartile range; LAPS2, Laboratory Acute Physiology Score, version 2;<sup>29</sup> SD, standard deviation.



**eTable 6.** Baseline Characteristics of Hospitalizations for Alcohol Withdrawal Syndrome 12 mo Before and After Implementation

| Characteristic                                                  | With use of an orderset           |                                    | Without use of an orderset        |                                    |
|-----------------------------------------------------------------|-----------------------------------|------------------------------------|-----------------------------------|------------------------------------|
|                                                                 | Pre-implementation<br>(n = 2,568) | Post-implementation<br>(n = 4,652) | Pre-implementation<br>(n = 1,881) | Post-implementation<br>(n = 3,709) |
| Age, mean (SD), years                                           | 53.6 (14.2)                       | 54.7 (14.7)                        | 59.4 (15.0)                       | 61.7 (15.3)                        |
| Male, (%)                                                       | 1,775 (69.1)                      | 3,244 (69.7)                       | 1,309 (69.6)                      | 2,475 (66.7)                       |
| Observation admission, (%)                                      | 246 (9.6)                         | 327 (7.0)                          | 114 (6.1)                         | 94 (2.5)                           |
| Weekend admission, (%)                                          | 699 (27.2)                        | 1,239 (26.6)                       | 359 (19.1)                        | 795 (21.4)                         |
| LAPS2, mean (SD)                                                | 67.8 (37.7)                       | 73.8 (39.7)                        | 54.5 (43.6)                       | 69.4 (45.8)                        |
| COPS2, mean (SD)                                                | 39.8 (43.6)                       | 40.4 (46.9)                        | 60.3 (58.0)                       | 63.1 (62.0)                        |
| Urine toxicology checked, (%)                                   | 1,130 (44.0)                      | 2,129 (45.8)                       | 325 (17.3)                        | 777 (20.9)                         |
| Had ≥1 prior hospitalization for AWS within prior 6 months, (%) | 822 (32.0)                        | 1,545 (33.2)                       | 364 (19.4)                        | 719 (19.4)                         |
| Had ≥1 CIWA-Ar value recorded, (%)                              | 2,543 (99.0)                      | 4,525 (97.3)                       | 210 (11.2)                        | 159 (4.3)                          |
| <b>Elixhauser comorbidities<sup>a</sup></b>                     |                                   |                                    |                                   |                                    |
| Alcohol abuse, (%)                                              | 2,164 (84.3)                      | 4,145 (89.1)                       | 1,816 (96.5)                      | 3,654 (98.5)                       |
| Hypertension <sup>b</sup> , (%)                                 | 1,501 (58.5)                      | 2,814 (60.5)                       | 1,232 (65.5)                      | 2,555 (68.9)                       |
| Fluid and electrolyte disorders, (%)                            | 1,548 (60.3)                      | 2,942 (63.2)                       | 844 (44.9)                        | 2,086 (56.2)                       |
| Peripheral vascular disease, (%)                                | 935 (36.4)                        | 2,006 (43.1)                       | 990 (52.6)                        | 2,335 (63.0)                       |
| Liver disease, (%)                                              | 1,110 (43.2)                      | 2,229 (47.9)                       | 669 (35.5)                        | 1,515 (40.8)                       |
| <b>Hospital outcomes</b>                                        |                                   |                                    |                                   |                                    |
| Inpatient mortality, (%)                                        | 41 (1.6)                          | 93 (2.0)                           | 32 (1.7)                          | 166 (4.5)                          |
| Length of stay, mean (SD), d                                    | 4.4 (6.8)                         | 4.4 (5.4)                          | 4.6 (6.6)                         | 5.2 (7.0)                          |
| ICU admission, (%)                                              | 641 (25.0)                        | 1,229 (26.4)                       | 397 (21.1)                        | 841 (22.7)                         |
| Readmission within 30 days, (%)                                 | 451 (17.8)                        | 718 (15.7)                         | 392 (21.2)                        | 766 (21.6)                         |

<sup>a</sup>Includes only the 5 most common comorbidities.

<sup>b</sup>Includes complicated and uncomplicated hypertension.

Abbreviations: AWS, alcohol withdrawal; CIWA-Ar, Clinical Institute Withdrawal Assessment for Alcohol, revised;<sup>8</sup> COPS2, Comorbidity Point Score, version 2;<sup>29</sup> ICU, intensive care unit; IQR, interquartile range; LAPS2, Laboratory Acute Physiology Score, version 2;<sup>29</sup> SD, standard deviation.

## eMethods. SAS Code for Difference-in-Differences Analysis

```
%macro did(outcome,dist,link,where);
PROC GEE DATA = etohrx;
&where.;
class post mrn orig_fac_id os mon;
model &outcome.(event='1')=age_at_admit male cops2 laps2 prior_hosp obs_only admit_weekend mon
urinetox post os os*post time0 time1 os*time0 os*time1 orig_fac_id/dist=&dist. link=&link.;
REPEATED subject = MRN/ type=exch covb corrw;
lsmeans os*post/cl ilink;
estimate os*post 1 -1 -1 1/cl ilink;
output out=adj pred=p0;
ods output GEEEmpPEst=geeest lsmeans=lsm estimates=diff parameterestimates=beta;
run;

data beta;
set beta;
outcome="&outcome.";
if parameter eq 'time0*os' and level1 eq 'No';
if "&link." eq "identity" and outcome eq 'los_day' then outcome='los_linear';
if "&link." eq "identity" and outcome eq 'lorazepam_tot' then outcome='lor_linear';
run;

data betas;
  set betas beta;
  run;

  data diff;
  set diff;
  outcome="&outcome.";
  if "&link." eq "identity" and outcome eq 'los_day' then outcome='los_linear';
  if "&link." eq "identity" and outcome eq 'lorazepam_tot0' then outcome='lor_linear';
  run;

  data lsme;
  set lsm;
  outcome="&outcome.";
  if "&link." eq "identity" and outcome eq 'los_day' then outcome='los_linear';
  if "&link." eq "identity" and outcome eq 'lorazepam_tot0' then outcome='lor_linear';
  run;

  data lsme;
  set lsme lsme;
  run;

  data diffs;
  set diffs diff;
  run;
%mend;
```

Legend: &where, used to remove deaths for the readmission outcome; &link, LOG link for POISSON and GAMMA distributions and IDENTITY for normal; &dist, GAMMA and NORMAL for length of stay and POISSON for the binary outcomes; Time0, denotes the month number starting with month=1 until the end of the study; Time1, set to 0 for months in the pre-period and has values 1 to number of months in the post period.
